# Supplementary material
Source: PubMed Central journal article supplement (PMC5003276)
Supplement: pnas.1600749113.sapp.pdf [file pnas.1600749113.sapp.pdf]

# Supplementary Material: Atomic resolution structure of a disease-relevant A $\beta$ (1–42) amyloid fibril

Marielle Aulikki Wälti<sup>a§</sup>, Francesco Ravotti<sup>a§</sup>, Hiromi Arai<sup>b</sup>, Charles Glabe<sup>b</sup>, Joseph Wall<sup>c</sup>, Anja Böckmann<sup>d\*</sup>, Peter Güntert<sup>e,f</sup>, Beat H. Meier<sup>a\*</sup>, Roland Riek<sup>a\*</sup>

§ Both authors contributed equally

<sup>a</sup>Laboratorium für Physikalische Chemie, ETH Zürich

Vladimir-Prelog-Weg 2

8093 Zürich (Switzerland)

E-Mail: roland.riek@phys.chem.ethz.ch; [beme@ethz.ch](mailto:beme@ethz.ch); a.boeckmann@ibcp.fr

<sup>b</sup>Department of Molecular Biology and Biochemistry, University of California, Irvine, CA 92697, USA

<sup>c</sup>Brookhaven National Laboratory, 50 Bell Avenue, Building 463, Upton, NY 11973-5000 (USA)

<sup>d</sup>Institut de Biologie et Chimie des Protéines, Bases Moléculaires et Structurales des Systèmes Infectieux, Labex Ecofect, UMR 5086 CNRS, Université de Lyon

7 passage du Vercors

69007 Lyon (France)

<sup>e</sup>Institute of Biophysical Chemistry, Center for Biomolecular Magnetic Resonance, Goethe University Frankfurt am Main, Max-von-Laue-Str. 9, 60438 Frankfurt am Main, Germany

<sup>f</sup>Department of Chemistry, Graduate School of Science and Engineering, Tokyo Metropolitan University, 1-1 Minami-Ohsawa, Hachioji, Tokyo 192-0397, Japan

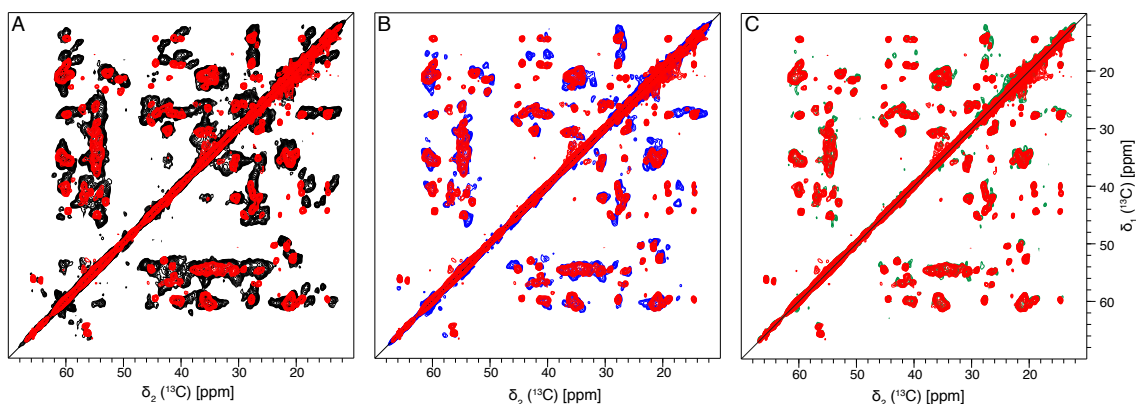

**Fig. S1.** Screening of conditions towards a sample with a single polymorph. Superposition of several 2D [ $^{13}\text{C}$ ,  $^{13}\text{C}$ ] DARR spectra (20 ms mixing time, 13 kHz MAS, 14 T B0) of A $\beta$ (1-42) fibrils grown at different conditions. The condition 2 (red) is compared to condition 0 (black) (A), to condition 3 (blue) (B) and to condition 4 (green) (C). Condition 0 shows very broad lines and no clearly defined peaks. This condition shows at least 3 polymorphs.

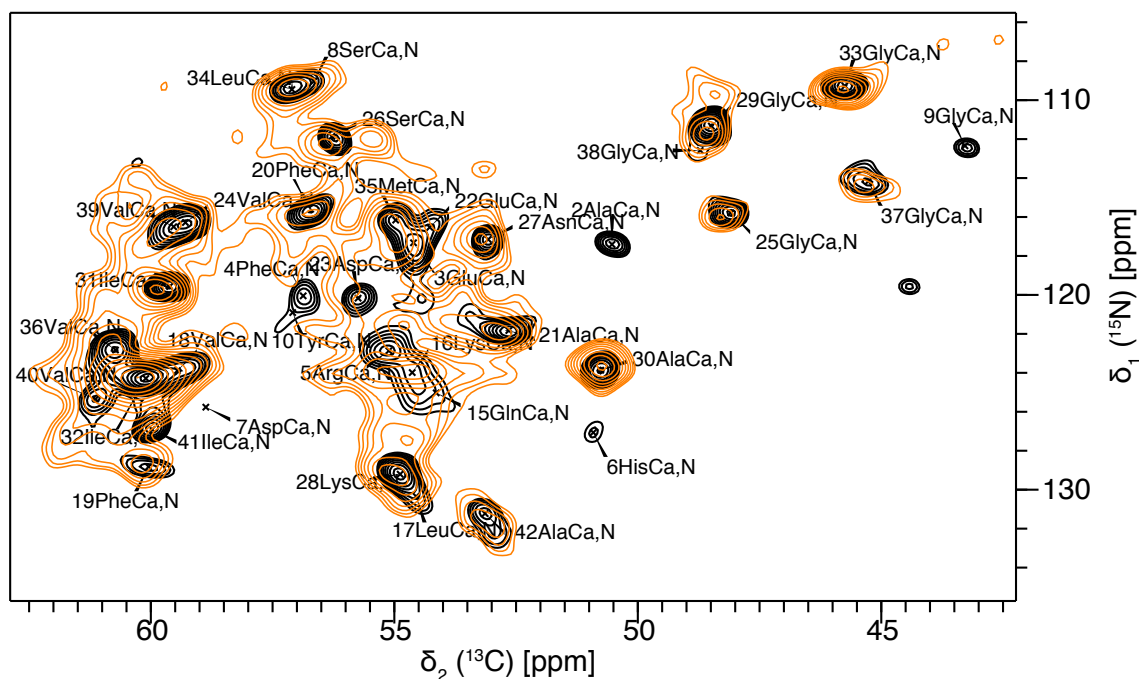

**Fig. S2.** Superposition of a NCA (plotted in black) and TEDOR (plotted in orange) spectra measured on uniformly labeled  $^{13}\text{C}$ ,  $^{15}\text{N}$ -labeled fibrils and 50% mixed labeled  $^{13}\text{C}$ ,  $^{15}\text{N}$ -labeled fibrils, respectively. Peaks in the NCA spectrum are labeled according to the assignment. The presence of superimposing cross-peaks between two spectra indicates an in-register parallel  $\beta$ -sheet structure.

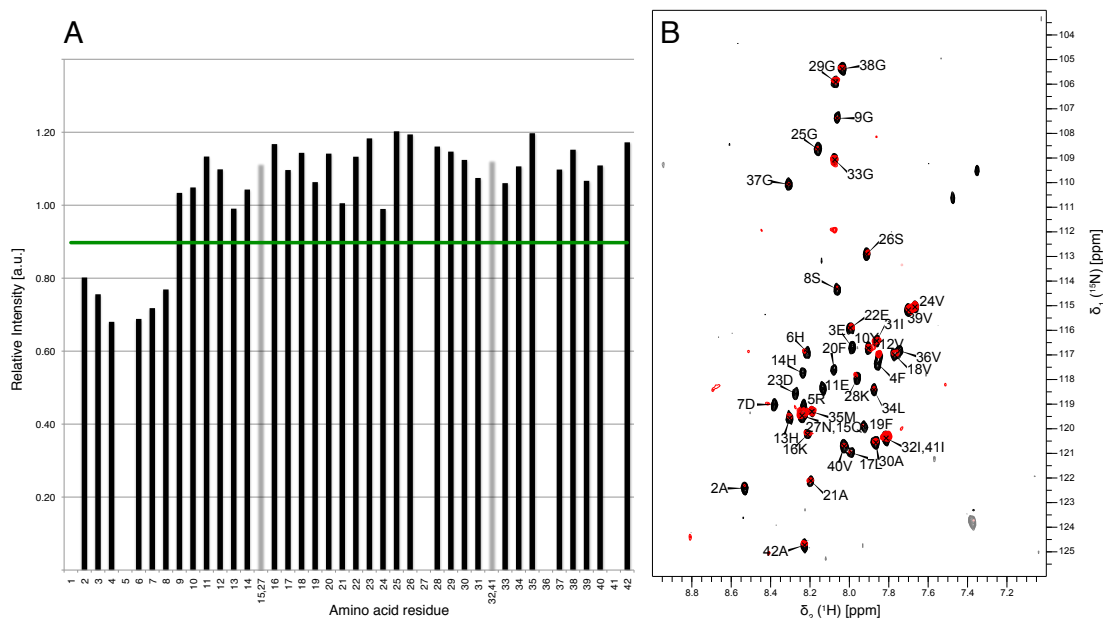

**Fig. S3.** Limited proteolysis by proteinase K of A $\beta$ (1-42) fibrils grown under condition 2 indicating the heterogenous structural nature of its N-terminal segment. (A) The relative intensities of the  $^{15}\text{N}$ - $^1\text{H}$  moieties measured in a  $^{15}\text{N}$ - $^1\text{H}$ -TROSY spectra of the digested fibrils are represented as bars in relation to the control sample (without digestion). In grey are data shown from overlapping cross-peaks. The green lines represent the median of the intensity ratios plus (upper) and minus (lower) the standard deviation of the measurements. (B) In black is shown the  $^{15}\text{N}$ - $^1\text{H}$ -TROSY reference spectrum of A $\beta$ (1-42) in 85% DMSO, 0.1% TFA and 10%  $\text{H}_2\text{O}$  recorded at 298 K on a Bruker 700 MHz spectrometer. The individual cross-peaks are assigned with the one letter amino acid code. In red, the corresponding  $^{15}\text{N}$ - $^1\text{H}$ -TROSY spectrum is shown after overnight proteinase K digestion of the fibrils in buffer condition 2 at 37 °C in a ratio of 1:10 (w/w) proteinase K: A $\beta$ (1-42).

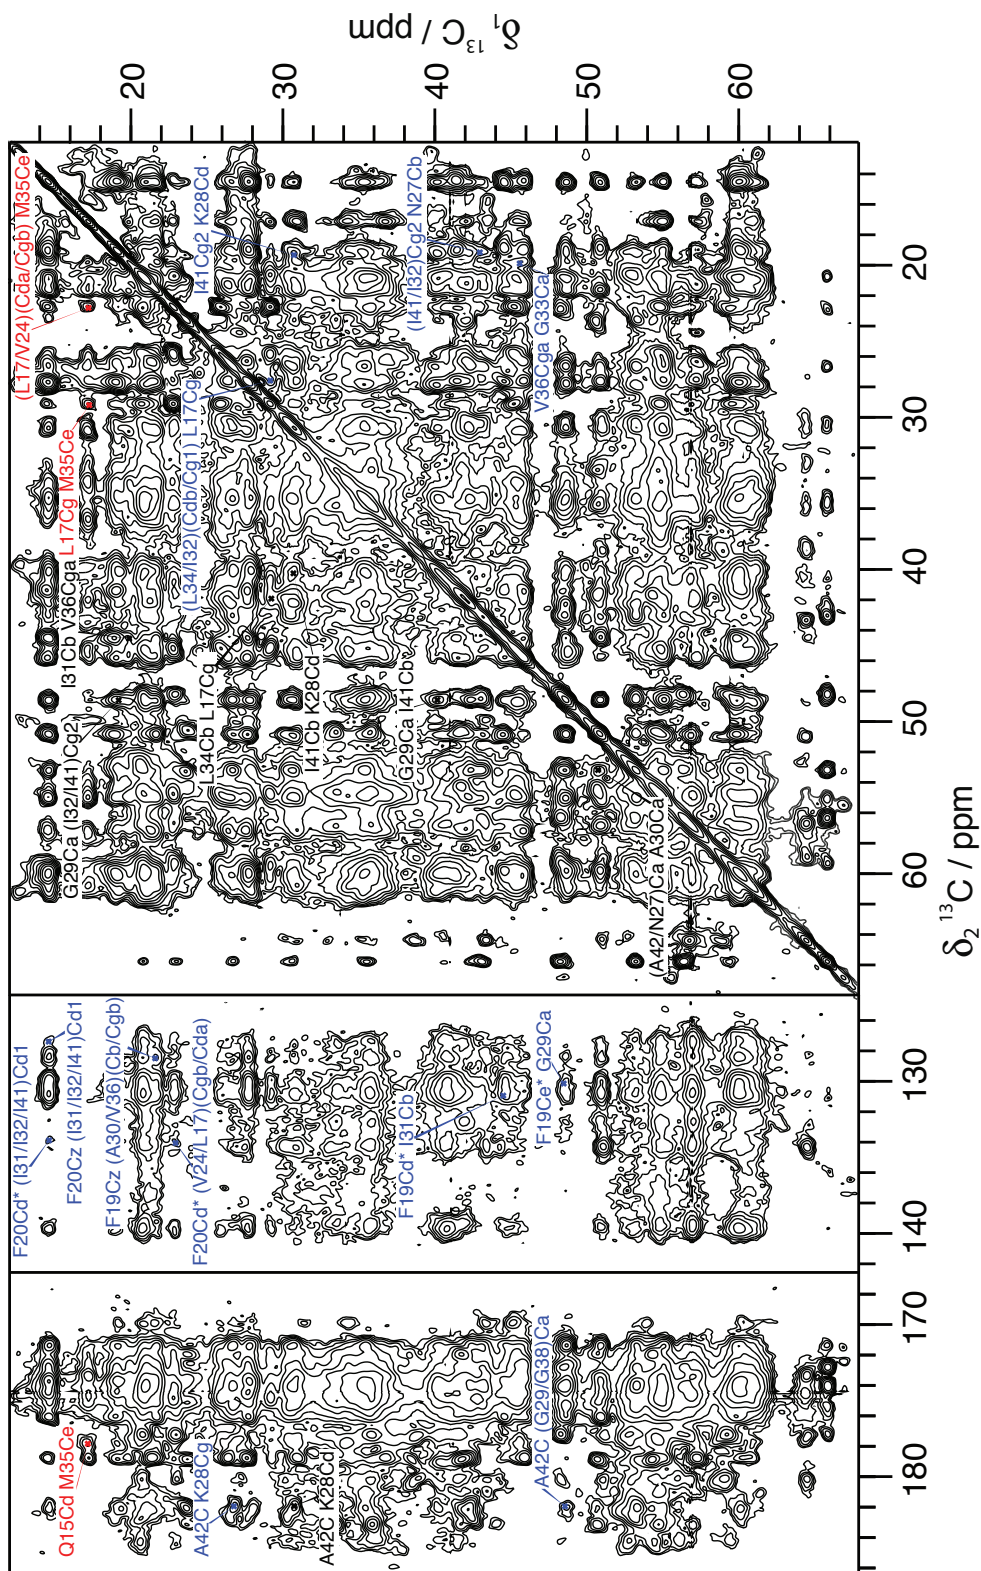

**Fig. S4.** 400 ms DARR spectrum as described in the main text. Cross-peaks listed in Table S2 and used in the calculation are marked by crosses and labeled in red (intermolecular restraints), black (intramolecular) or blue (ambiguous with respect to intra-/intermolecular).

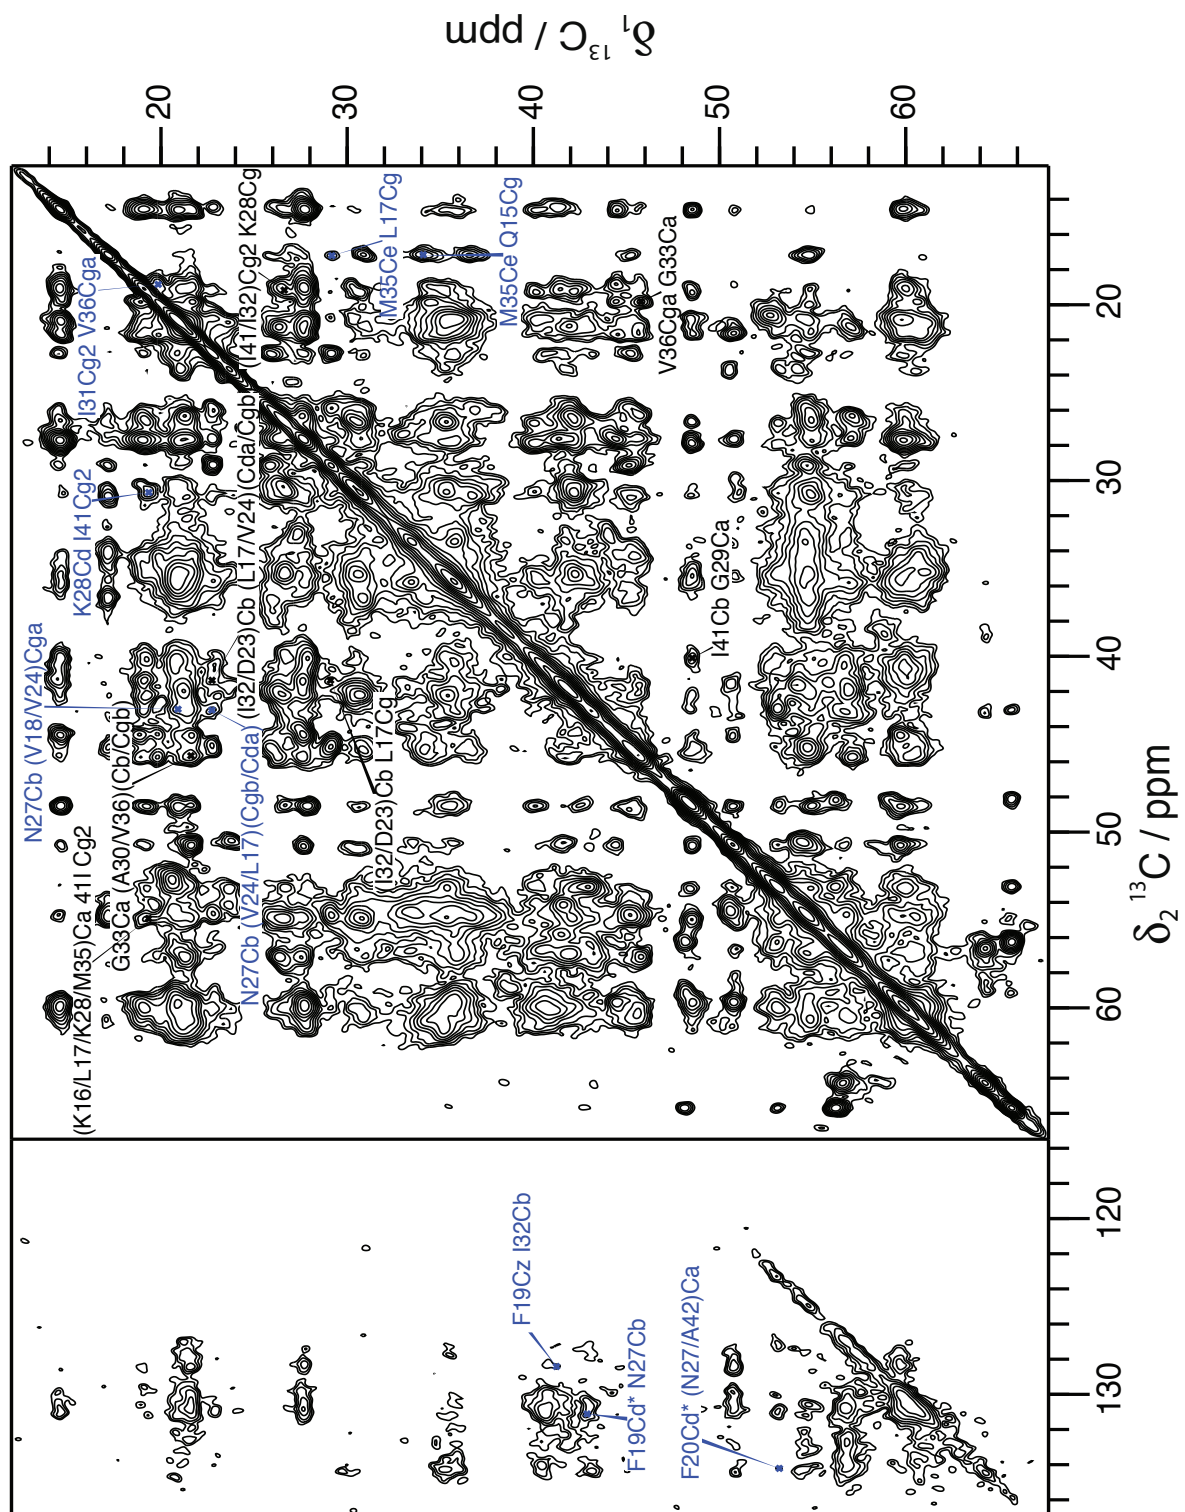

**Fig. S5.** 400  $\mu$ s CHHC spectrum as described in the main text. Cross-peaks listed in Table S2 and used in the calculation are marked by crosses and labeled in red (intermolecular restraints), black (intramolecular) or blue (ambiguous with respect to intra-/intermolecular).

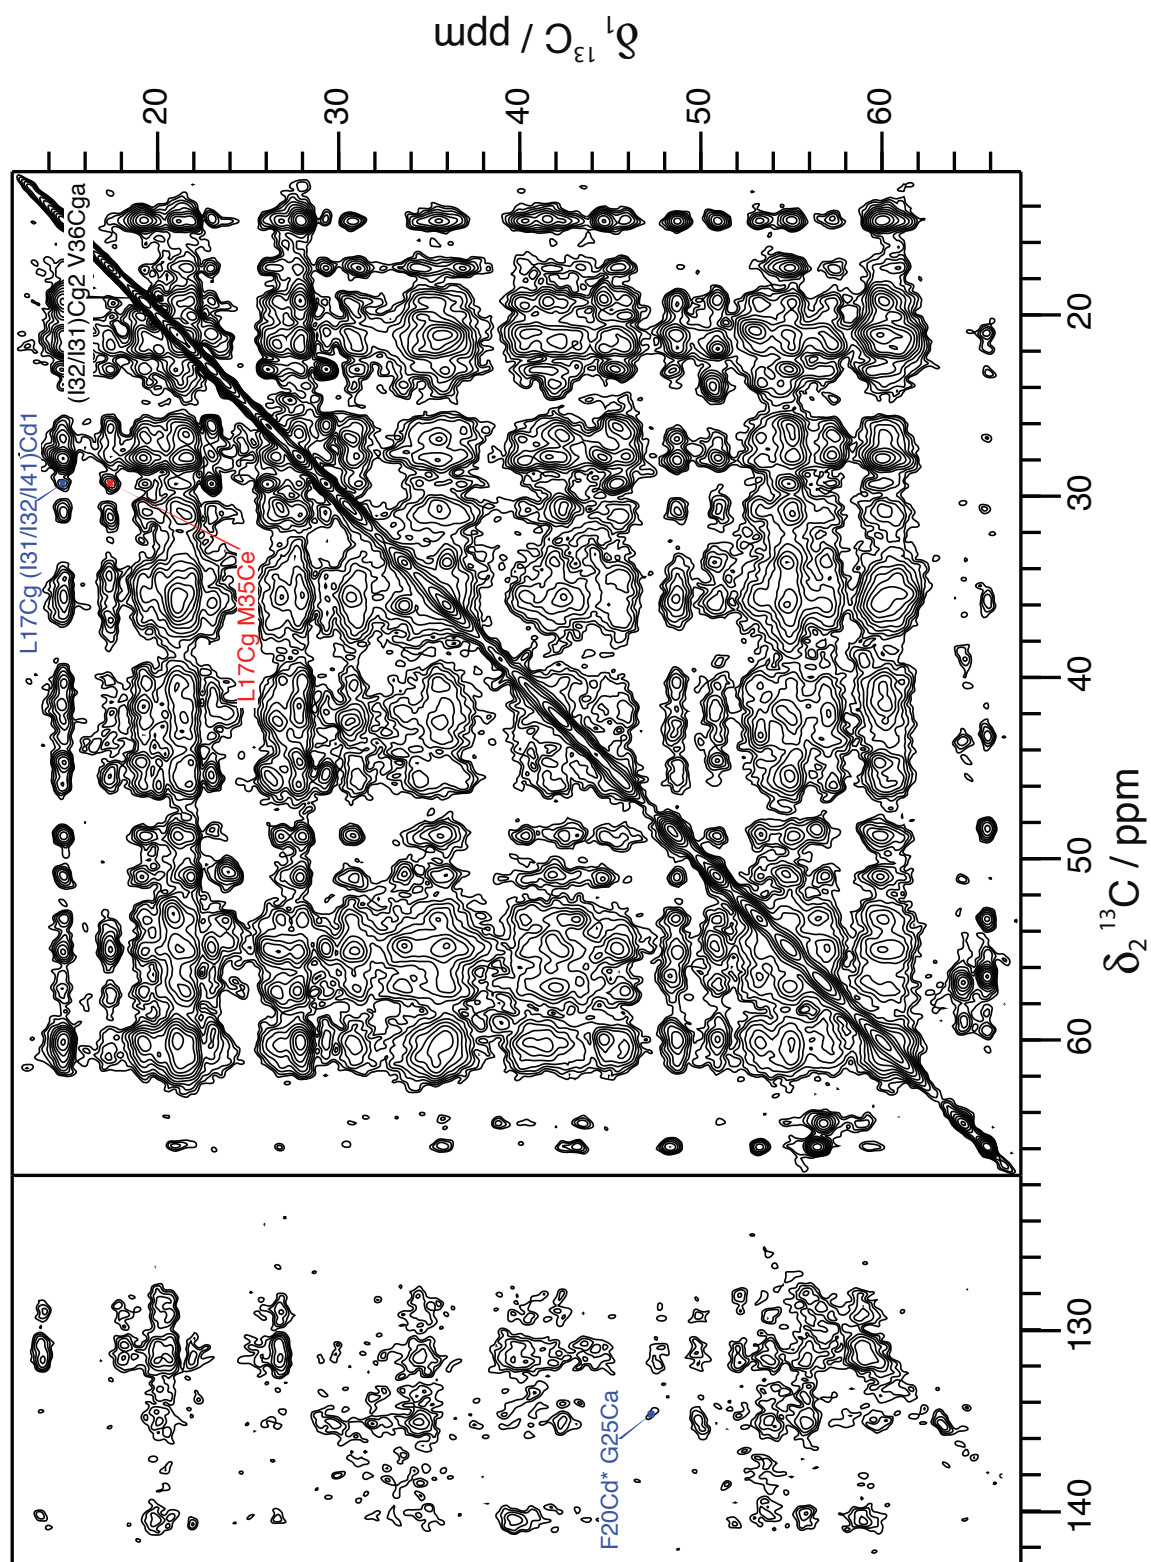

**Fig. S6.** 8 ms PAR spectrum as described in the main text. Cross-peaks listed in Table S2 and used in the calculation are marked by crosses and labeled in red (intermolecular restraints), black (intramolecular) or blue (ambiguous with respect to intra-/intermolecular).

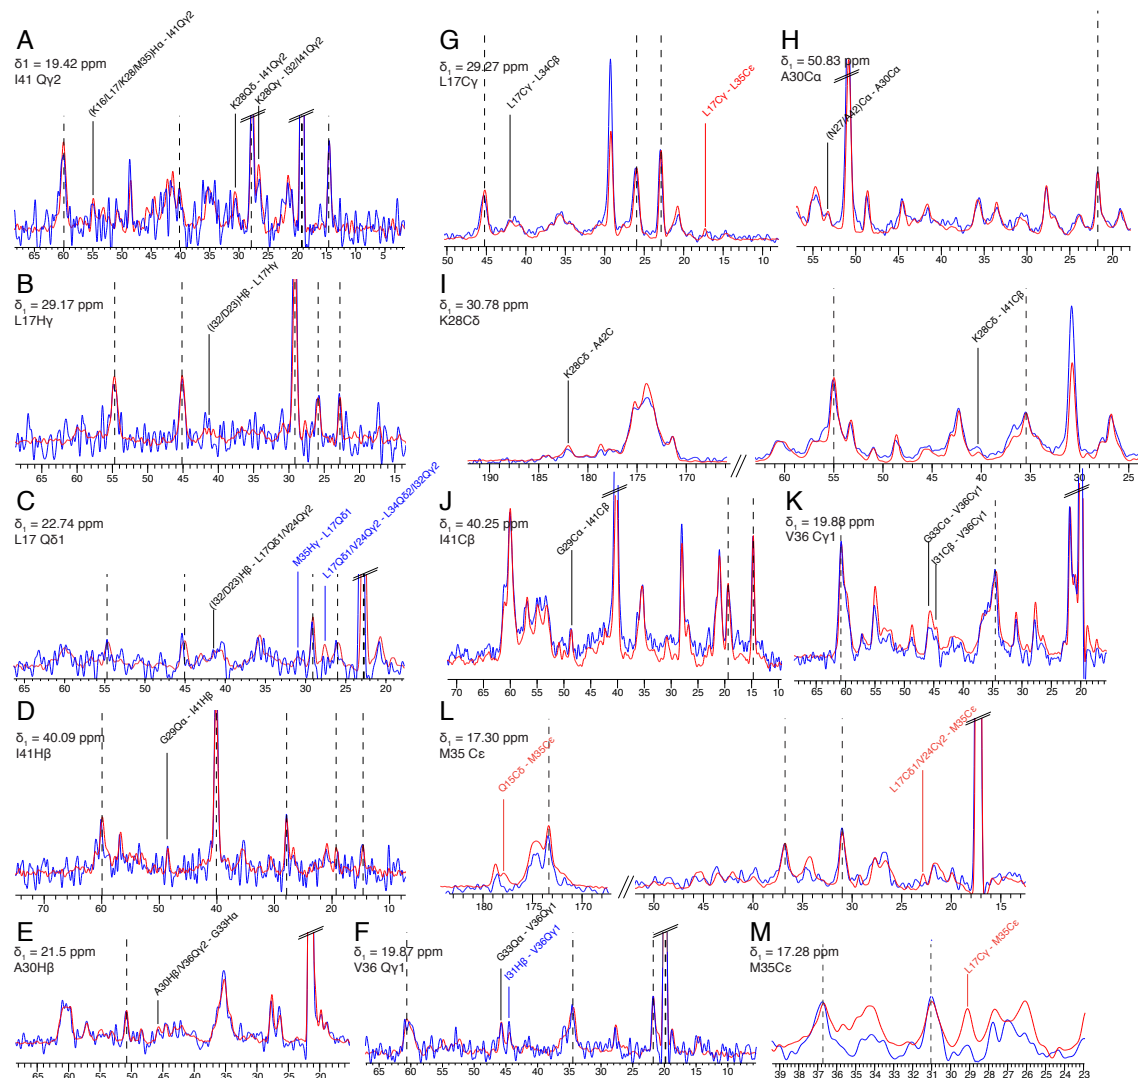

**Fig. S7.** Selected traces from the 400  $\mu$ s CHHC (A-F), 400 ms DARR (G-L) and 8 ms PAR (M) spectrum of A $\beta$ (1-42) fibrils. In red are the traces from the uniformly  $^{13}\text{C}$ ,  $^{15}\text{N}$ -labelled sample, while in blue are the corresponding traces from the diluted sample. The frequency of the trace together with the corresponding assignments are listed on the top left of each subfigure. Cross-peaks of interest are labeled black if they are considered to be intra-molecular, red inter-molecular, and blue if they are spectrally unambiguous intra- or intermolecular. The calibration of the diluted spectra was performed using the intra-residual peaks (black dashed line).

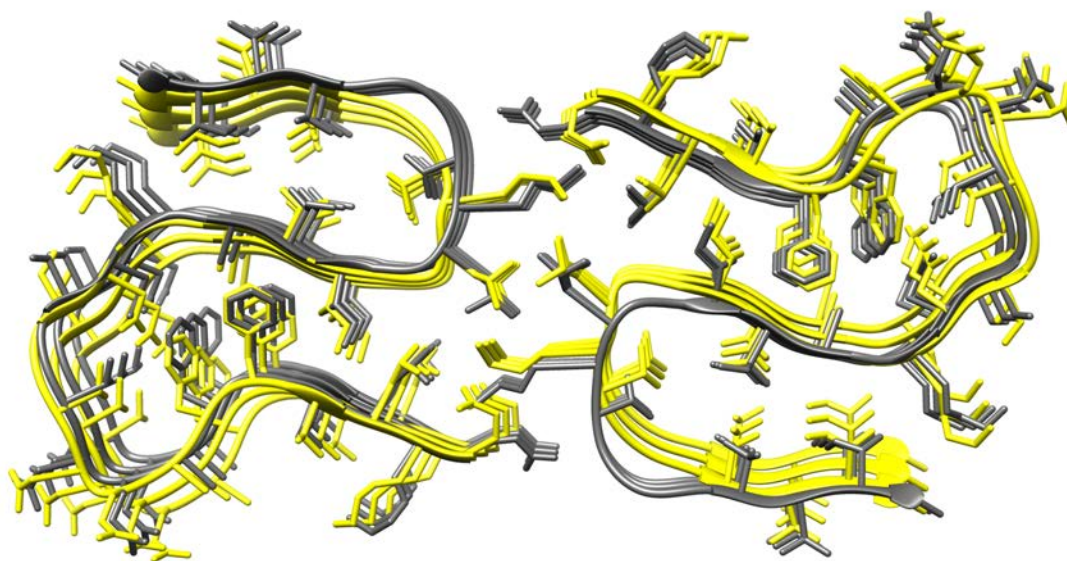

**Fig. S8.** Superposition of the 3D structures of the manual calculation and the automatic one. In yellow are 3 layers of the A $\beta$ (1-42) fibrils using only manually assigned peaks, whereas in grey, automatically picked peaks are included to the structure calculation. The two structures superimpose well with an RMSD of 0.98 Å.

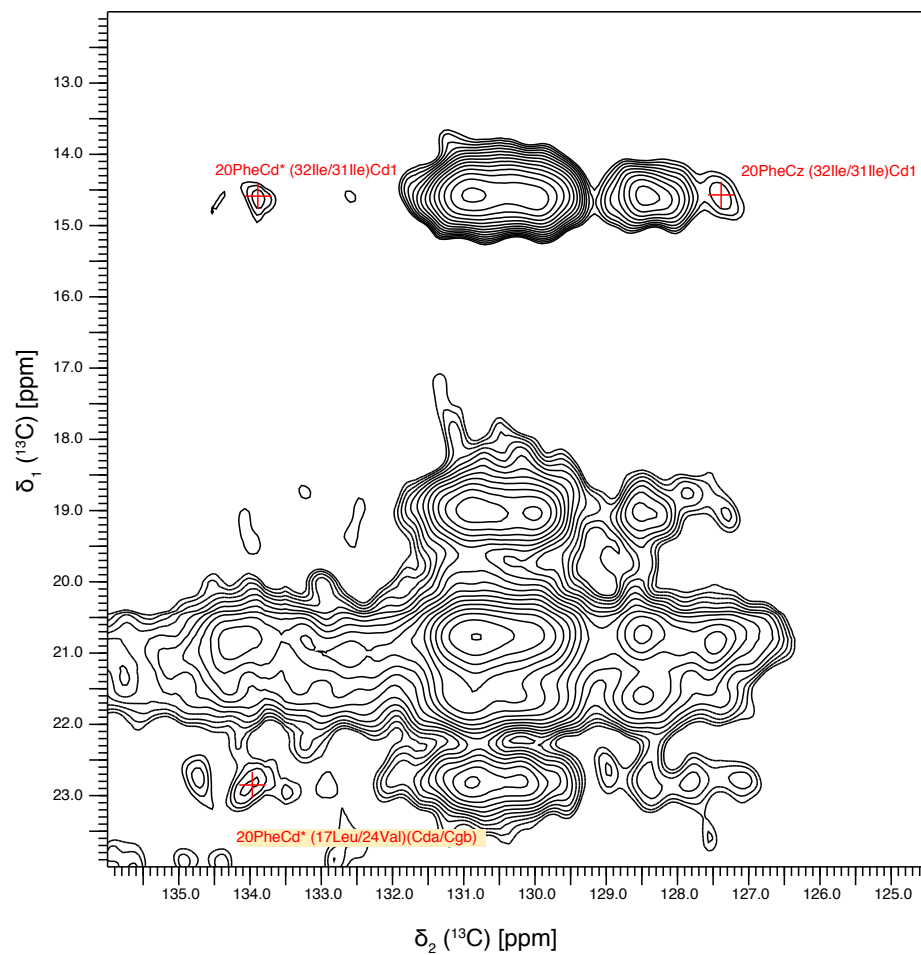

**Fig. S9.** Extract of the 400 ms DARR spectrum showing additional contacts demonstrating that F20 is oriented inside the hydrophobic core.

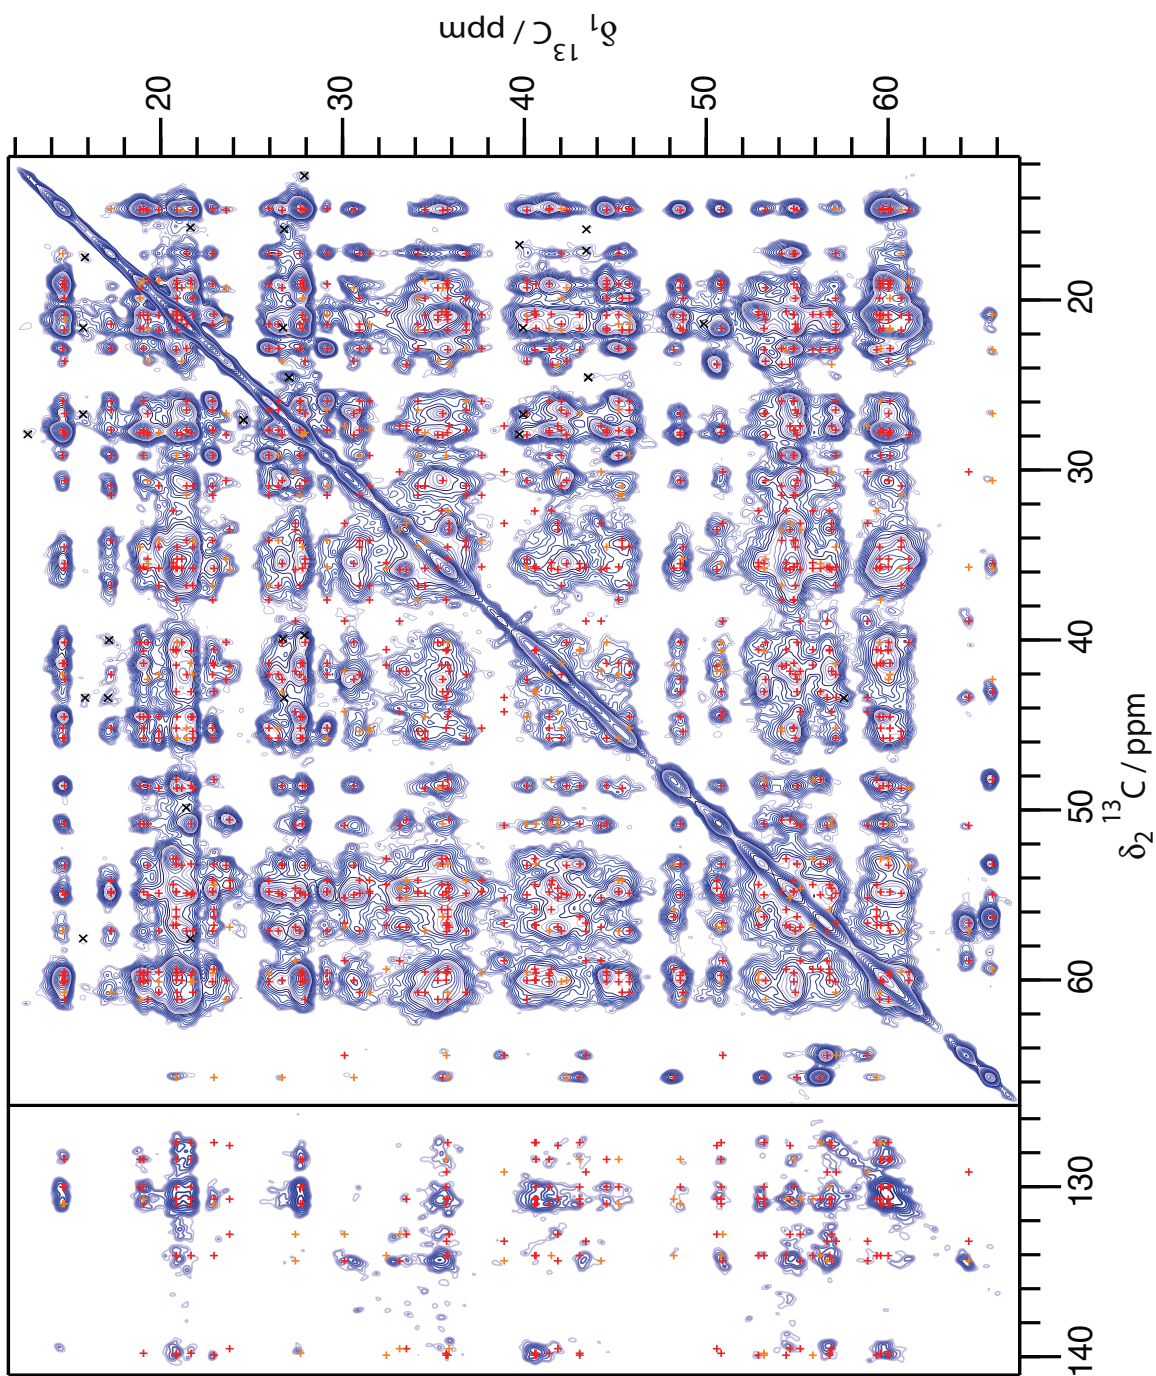

**Fig. S10.** Cross peak back-calculation from the determined 3D structure onto the PAR spectrum. Blue contours: aliphatic and aromatic regions of a PAR spectrum with 8 ms mixing time recorded on uniformly  $^{15}\text{N}$ ,  $^{13}\text{C}$ -labeled fibrils at 19 kHz MAS at a static magnetic field of 20.0 T (850 MHz proton frequency). Contacts between  $^{13}\text{C}$  nuclei up to 7 Å were calculated from the structure of Fig. 4 and back-predicted onto the spectrum. Red crosses mark the expected peak positions. Contacts between 7 and 8 Å are marked in yellow. Black crosses mark remainders of a second polymorph. The back-calculation matches the experimental spectrum.

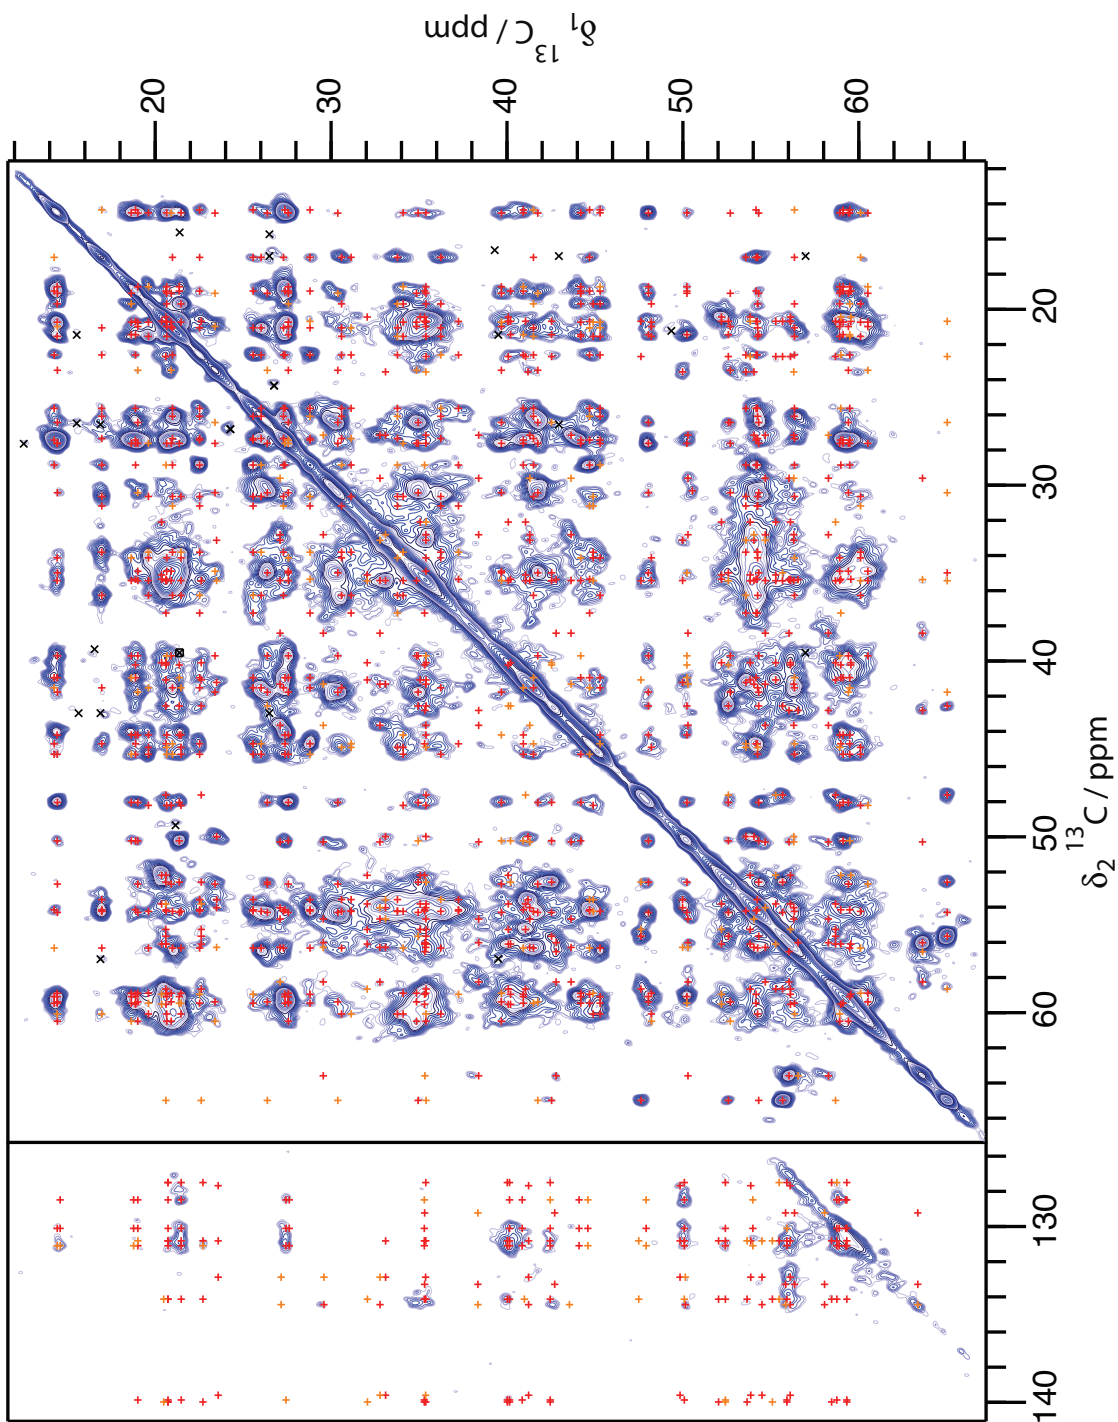

**Fig. S11.** Cross peak back-calculation from the determined 3D structure onto the CHHC spectrum. Blue contours: aliphatic region of a CHHC spectrum with 400  $\mu\text{s}$  mixing time recorded on uniformly  $^{15}\text{N}$ ,  $^{13}\text{C}$ -labeled fibrils at 19 kHz MAS at a static magnetic field of 20.0 T (850 MHz proton frequency). Contacts between  $^{13}\text{C}$  nuclei up to 5.5  $\text{\AA}$  were calculated from the structure of Fig. 4 and back-predicted onto the spectrum. Red crosses mark the expected peak positions. Contacts between 5.5 and 6.5  $\text{\AA}$  are marked in yellow. Black crosses mark remainders of a second polymorph. The back-calculation matches the experimental spectrum.

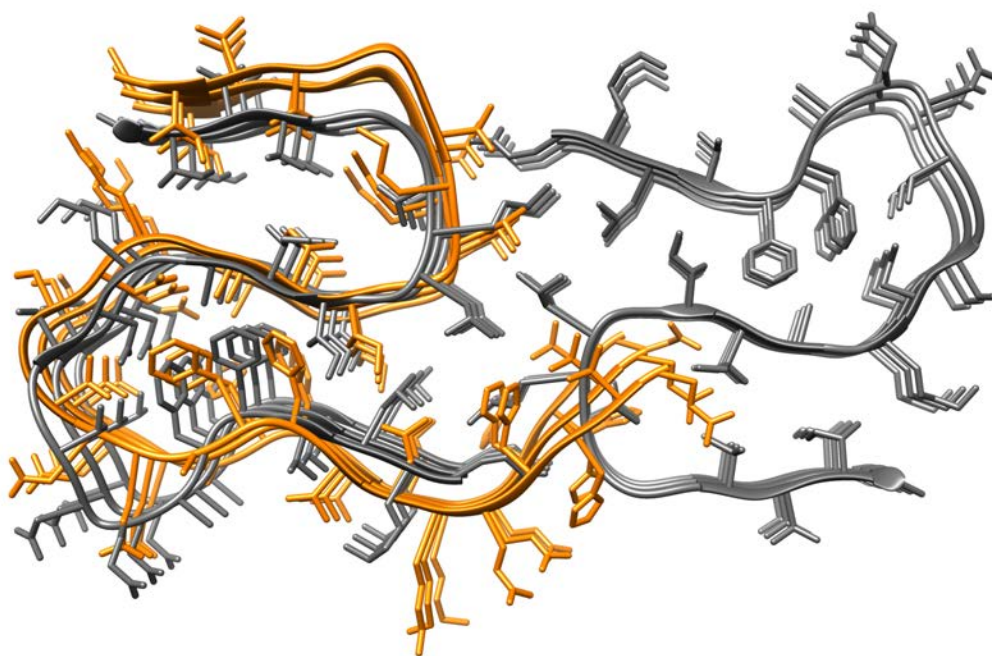

**Fig. S12.** Comparison of the 3D structures of the A $\beta$ (1-42) fibrils from this study (grey) to a previously published structure (orange) (2mxu.pdb). The two structures do not superimpose well having an RMSD of 4.1 Å. Clear differences are found in the number of molecules per layer and in the side chain packing within the region of amino acid residues 34-36 for example.

**Table S1:** Condition screening of A $\beta$ (1–42) fibrils including sample preparations of others.

| Nr.                                 | Seeding | A $\beta$ species                      | A $\beta$ concentration<br>[ $\mu$ M] | Shaking | Temperature         | buffer                               | Additives/Salt                                   | Polymorphisms |
|-------------------------------------|---------|----------------------------------------|---------------------------------------|---------|---------------------|--------------------------------------|--------------------------------------------------|---------------|
| 0                                   | No      | recombinant<br>A $\beta$ (1-42)        | 150                                   | gently  | 37 °C               | 100 mM<br>phosphate<br>pH 7.4        | no                                               | many          |
| 1                                   | Yes     | recombinant<br>A $\beta$ (1-42)        | 30                                    | 350 rpm | 37 °C               | 100 mM<br>phosphate<br>pH 7.4        | 100 mM<br>NaCl, 30 $\mu$ M<br>heparin<br>(~5kDa) | -             |
| 2                                   | Yes     | recombinant<br>A $\beta$ (1-42)        | 30                                    | 350 rpm | 37 °C               | 100 mM<br>phosphate<br>pH 7.4        | 100 mM<br>NaCl, 100 $\mu$<br>M ZnCl              | 1             |
| 3                                   | Yes     | recombinant                            | 30                                    | 350 rpm | 37 °C               | 100 mM<br>phosphate<br>pH 7.4        | 100 mM NaCl                                      | ~2            |
| 4                                   | Yes     | recombinant<br>A $\beta$ (1-42)        | 100                                   | 350 rpm | 37 °C               | 100 mM<br>phosphate<br>pH 7.4        | 100 mM<br>NaCl, 100 $\mu$<br>M ZnCl              | 1             |
| Ishii and<br>coworkers<br>[27]      | Yes     | synthetic A<br>$\beta$ (1-42)          | 50                                    | slow    | room<br>temperature | 10 mM<br>phosphate<br>pH 7.4         | no                                               | 1             |
| Griffin<br>and<br>coworkers<br>[54] | Yes     | recombinant<br>A $\beta$ (M0,1-<br>42) | 10-50                                 | n.d.    | room<br>temperature | 20 mM<br>sodium<br>phosphate<br>pH 8 | no                                               | 1             |

**Table S2.** Manually assigned restraints for the structure calculation. In grey are the intra-molecular restraints, in pink the inter-molecular ones, and no color shows that the restraint cannot be classified as inter- or intra-molecular (and is used as ambiguous with respect to inter- or intramolecular in the calculations). Spectrally unambiguous restraints have a single entry, and spectrally ambiguous restraints have several entries reflecting the different assignment possibilities. One or two arrows in front of the entry indicate that the intramolecular or intermolecular assignment has been fulfilled in the structure calculation, respectively. The restraints have been collected from the PAR, the CHHC or the DARR spectra as indicated. Q indicates pseudoatoms that represent a group of degenerate hydrogen atoms. UPL indicates the upper distance bound used in Å, and d indicates the average distance in the final structure bundle.

| PAR | ω1      | ω2      | UPL | d    |
|-----|---------|---------|-----|------|
| ➤   | I31 CG2 | V36 CG1 | 7.0 | 6.72 |
|     | I32 CG2 |         |     |      |
| ➤➤  | L17 CG  | M35 CE  | 7.0 | 5.37 |
|     | L17 CG  | I31 CD1 |     |      |
| ➤   |         | I32 CD1 | 7.0 | 4.47 |
|     |         | I41 CD1 |     |      |

| CHHC | ω1      | ω2      | UPL | d    |
|------|---------|---------|-----|------|
|      | K16 HA  | I41 QG2 |     |      |
|      | L17 HA  |         |     |      |
| ➤    | K28 HA  |         | 5.5 | 3.19 |
|      | M35 HA  |         |     |      |
|      | L17 HG  | D23 HB  |     |      |
| ➤    |         | I32 HB  | 5.5 | 5.37 |
|      | L17 HG  | I32 QD1 |     |      |
| ➤    |         | I32 QD1 | 5.5 | 2.77 |
|      |         | I41 QD1 |     |      |
|      | L17 QD1 | I31 QD1 |     |      |
| ➤    |         | I32 QD1 | 5.5 | 3.52 |
|      |         | I41 QD1 |     |      |
|      | V24 QG2 | I31 QD1 |     |      |
|      |         | I32 QD1 |     |      |
|      |         | I41 QD1 |     |      |
|      | L17 QD1 | D23 QB  |     |      |
| ➤    |         | I32 HB  |     |      |
| ➤    | V24 QG2 | D23 QB  | 5.5 | 5.07 |
|      |         | I32 HB  |     |      |
| ➤    | N27 QB  | A30 QB  | 5.5 | 2.36 |
|      |         | G9 QA   |     |      |
|      | K28 QG  | I32 QG2 |     |      |
| ➤    |         | I41 QG2 | 5.5 | 2.48 |
| ➤    | 29 QA   | I41 HB  | 5.5 | 2.71 |
| ➤    | G29 QA  | I41 QG2 | 5.5 | 2.01 |
|      | A30 HB  | G33 QA  |     |      |
| ➤    | V36 QG2 |         | 5.5 | 2.22 |
| ➤    | G33 QA  | V36 QG1 | 5.5 | 4.21 |
| ➤➤   | Q15 QG  | M35 QE  | 5.5 | 2.96 |
|      | L17 QD1 | N27 QB  |     |      |
| ➤    | V24 QG1 |         | 5.5 | 4.91 |
|      | L17 QD1 | K28 QD  |     |      |
| ➤    | V24 QG1 |         |     |      |
| ➤➤   | L17 QD1 | M35 QG  | 5.5 | 3.93 |
|      | V24 QG1 |         |     |      |

|    |         |         |     |      |
|----|---------|---------|-----|------|
| ➤  | L17 QD1 | I32 QG1 | 5.5 | 3.36 |
| ➤  |         | L34 QD2 |     |      |
|    | V24 QG2 | I32 QG1 |     |      |
|    |         | L34 QD2 |     |      |
| ➤  | L17 QD1 | I32 QG2 | 5.5 | 4.77 |
|    |         | I41 QG2 |     |      |
|    | V24 QG2 | I32 QG2 |     |      |
|    |         | I41 QG2 |     |      |
|    | L17 HG  | I32 QD1 |     |      |
| ➤  |         | I32 QD1 | 5.5 | 2.77 |
|    |         | I41 QD1 |     |      |
| ➤  | L17 HG  | L34 QB  | 5.5 | 5.44 |
| ➤  | L17 HG  | L34 QD1 | 5.5 | 4.76 |
|    |         | V40 QG1 |     |      |
| ➤➤ | L17 HG  | M35 QE  | 5.5 | 4.87 |
| ➤➤ | L17 QD1 | M35 QE  | 5.5 | 2.85 |
| ➤➤ | L17 QD2 | M35 QB  | 5.5 | 4.67 |
|    | V18 QG1 | N27 QB  |     |      |
| ➤  | V24 QG1 |         | 5.5 | 4.89 |
| ➤  | F19 QD  | N27 QB  | 5.5 | 4.43 |
| ➤  | F19 QD  | N27 HA  | 5.5 | 5.53 |
|    |         | A42 HA  |     |      |
| ➤  | F19 QE  | I32 QG1 | 5.5 | 3.93 |
|    |         | L34 QD2 |     |      |
|    |         | R5 QG   |     |      |
| ➤  | F19 QE  | I31 QD1 |     |      |
| ➤  |         | I32 QD1 | 5.5 | 3.25 |
|    |         | I41 QD1 |     |      |
| ➤  | F19 QE  | A30 HA  | 5.5 | 2.62 |
|    |         | H6 HA   |     |      |
| ➤  | F19 HZ  | I32 HB  | 5.5 | 4.56 |
| ➤  | F19 HZ  | A30 HA  | 5.5 | 3.00 |
|    |         | H6 HA   |     |      |
| ➤  | F19 HZ  | A30 QB  | 5.5 | 3.79 |
|    |         | V36 QG2 |     |      |
| ➤  | F19 HZ  | I31 QG1 | 5.5 | 3.98 |
|    |         | I32 QG1 |     |      |
|    |         | L34 QD2 |     |      |
| ➤  | N27 QB  | A30 HA  | 5.5 | 4.72 |
|    |         | H6 HA   |     |      |
|    | N27 QB  | I32 QG2 |     |      |
| ➤  |         | I41 QG2 | 5.5 | 5.45 |
| ➤  | K28 QD  | I41 QG2 | 5.5 | 2.83 |

|  |     |     |                   |                   |     |      |
|--|-----|-----|-------------------|-------------------|-----|------|
|  | K28 | QG  | L28<br>I32<br>I41 | QG<br>HA<br>HA    | 5.5 | 5.4  |
|  | K28 | QG  | I31<br>I32<br>I41 | QD1<br>QD1<br>QD1 | 5.5 | 5.19 |
|  | K28 | QE  | I32<br>I41        | QG2<br>QG2        | 5.5 | 4.28 |
|  | K28 | QD  | I31<br>I41        | QD1<br>QD1        | 5.5 | 5.50 |
|  | I31 | HB  | V36<br>Q15        | HB<br>QG          | 5.5 | 5.50 |
|  | I31 | QG2 | V36               | QG1               | 5.5 | 4.48 |

| DARR | ω1  |     | ω2                |                   | UPL | d    |
|------|-----|-----|-------------------|-------------------|-----|------|
| ➤    | L17 | CG  | L34               | CB                | 7.0 | 6.59 |
| ➤    | N27 | CA  | A30               | CA                | 7.0 | 5.76 |
|      | A42 | CA  |                   |                   |     |      |
| ➤    | K28 | CD  | I41               | CB                | 7.0 | 5.86 |
| ➤    | K28 | CD  | A42               | C                 | 7.0 | 3.68 |
|      | G29 | C   | I32               | CG2               |     |      |
| ➤    |     |     | I41               | CG2               | 7.0 | 4.78 |
| ➤    | G29 | CA  | I41               | CB                | 7.0 | 3.73 |
| ➤    | I31 | CB  | V36               | CG1               | 7.0 | 6.41 |
| ➤➤   | Q15 | CD  | M35               | CE                | 7.0 | 4.5  |
| ➤➤   | L17 | CD1 | M35               | CE                | 7.0 | 4.95 |
|      | V24 | CG2 |                   |                   |     |      |
|      | L17 | CD1 | N27               | CB                |     |      |
| ➤    | V24 | CG2 |                   |                   | 7.0 | 5.84 |
| ➤    | L17 | CG  | I32               | CG1               | 7.0 | 4.20 |
| ➤    |     |     | L34               | CD2               |     |      |
| ➤    | L17 | CG  | I32<br>I41        | CG2<br>CG2        | 7.0 | 5.45 |
| ➤    | L17 | CG  | L34               | CB                | 7.0 | 6.53 |
| ➤    | L17 | CD1 | I31<br>I32<br>I42 | CD1<br>CD1<br>CD1 | 7.0 | 5.19 |
|      | V24 | CG2 | I31<br>I32<br>I42 | CD1<br>CD1<br>CD1 |     |      |
| ➤    | L17 | CD1 | I32<br>I41        | CG2<br>CG2        | 7.0 | 6.70 |
|      | V24 | CG2 | I32<br>I41        | CG1<br>CG1        |     |      |
| ➤    | F19 | CE  | G29               | CA                | 7.0 | 6.46 |
| ➤    | F19 | CZ  | G29               | CA                | 7.0 | 7.03 |

|   |     |     |                   |                   |     |      |
|---|-----|-----|-------------------|-------------------|-----|------|
| ➤ | F19 | CE  | A30<br>H6         | CA<br>CA          | 7.0 | 3.44 |
| ➤ | F19 | CZ  | A30<br>V36        | CB<br>CG2         | 7.0 | 4.07 |
| ➤ | F19 | CZ  | A30<br>H6         | CA<br>CA          | 7.0 | 3.87 |
|   | F19 | CE  | I31<br>I32        | CG2<br>CG2        |     |      |
| ➤ |     |     |                   |                   | 7.0 | 4.14 |
| ➤ | F19 | CE  | I31<br>I32<br>L34 | CG1<br>CG1<br>CD2 | 7.0 | 4.37 |
| ➤ | F19 | CD1 | I31               | CB                | 7.0 | 6.43 |
| ➤ | F19 | CE  | I31               | CB                | 7.0 | 5.36 |
| ➤ | F19 | CZ  | I31               | CB                | 7.0 | 5.76 |
|   | F19 | CZ  | I31<br>I32        | CG2<br>CG2        |     |      |
| ➤ |     |     |                   |                   | 7.0 | 5.22 |
| ➤ | F19 | CZ  | I31<br>I32<br>L34 | CG1<br>CG1<br>CD2 | 7.0 | 5.18 |
| ➤ | F20 | CE  | I31<br>I32        | CG2<br>CG2        | 7.0 | 7.02 |
| ➤ | F4  | CE  | I31<br>I32        | CG2<br>CG2        |     |      |
|   | F20 | CA  | L17<br>V24        | CD1<br>CG2        | 7.0 | 5.67 |
| ➤ | S8  | CA  | L17<br>V24        | CD1<br>CG2        |     |      |
| ➤ | N27 | CB  | A30<br>H6         | CA<br>CA          | 7.0 | 5.36 |
| ➤ | K28 | CD  | I41               | CG2               | 7.0 | 4.57 |
| ➤ | K28 | CG  | A42               | C                 | 7.0 | 3.85 |
| ➤ | K28 | CE  | I41               | CG2               | 7.0 | 5.84 |
| ➤ | G29 | CA  | A42               | C                 | 7.0 | 6.98 |
|   | G38 | CA  |                   |                   |     |      |
| ➤ | V36 | CB  | I31<br>I32<br>I41 | CD1<br>CD1<br>CD1 | 7.0 | 5.65 |
| ➤ | G33 | CA  | V36               | CG1               | 7.0 | 5.89 |
|   | N15 | QG  | I31<br>I41        | QD1<br>QD1        |     |      |
| ➤ | V35 | QG  | I31<br>I41        | QD1<br>QD1        | 7.0 | 3.86 |

**Table S3.** Restraint and structure statistics.

| Quantity                                                       | manual and automated analysis | manual analysis     |
|----------------------------------------------------------------|-------------------------------|---------------------|
| Conformational restraints (per monomer): <sup>a</sup>          |                               |                     |
| Distance restraints from solid state NMR spectra: <sup>a</sup> | 632                           | 81                  |
| intraresidual                                                  | 18                            | 0                   |
| sequential ( $ i - j  = 1$ )                                   | 215                           | 1                   |
| medium range ( $2 \leq  i - j  \leq 4$ )                       | 202                           | 21                  |
| long range ( $ i - j  \geq 5$ )                                | 197                           | 59                  |
| intramolecular                                                 | 507                           | 20                  |
| intra- or intermolecular                                       | 108                           | 58                  |
| intermolecular                                                 | 17                            | 3                   |
| Restrained hydrogen bonds <sup>b</sup>                         | 16                            | 16                  |
| Dihedral angle restraints ( $\phi/\psi$ )                      | 38                            | 38                  |
| Restraint violations: <sup>c</sup>                             |                               |                     |
| CYANA target function value ( $\text{\AA}^2$ )                 | $1.90 \pm 0.04$               | $0.95 \pm 0.34$     |
| RMS distance restraint violation ( $\text{\AA}$ )              | $0.0023 \pm 0.0005$           | $0.0022 \pm 0.0006$ |
| Maximal distance restraint violation ( $\text{\AA}$ )          | 0.19                          | 0.09                |
| RMS dihedral angle restraint violation ( $^\circ$ )            | $0.10 \pm 0.08$               | $0.018 \pm 0.035$   |
| Maximal dihedral angle restraint violation ( $^\circ$ )        | 1.99                          | 1.01                |
| RMSD to mean for the central 2 monomers:                       |                               |                     |
| Backbone of residues 15–42 ( $\text{\AA}$ )                    | $0.89 \pm 0.19$               | $1.01 \pm 0.16$     |
| All heavy atoms of residues 15–42 ( $\text{\AA}$ )             | $1.14 \pm 0.16$               | $1.26 \pm 0.14$     |

<sup>a</sup>Each group of symmetrically equivalent distance restraints is counted as a single restraint. Distance restraints with multiple assignments are classified by the assignment spanning the shortest residue range.

<sup>b</sup>Each hydrogen bond was restrained by two upper and two lower distance bounds.

<sup>c</sup>Where applicable, the average value and the standard deviation over the 10 conformers that represent the NMR structure are given.

**Table S4.** Parameters used for solid-state NMR experiments for the structural calculation of the A $\beta$  fibrils. DL:  $^{13}\text{C}$ ,  $^{15}\text{N}$ -abelled A $\beta$ , diluted: labeling of A $\beta$  in a ratio of  $^{13}\text{C}$ ,  $^{15}\text{N}$ : $^{12}\text{C}$ ,  $^{14}\text{N}$  = 1:3. Squared brackets indicate the values for the respective labeling (depicted also in brackets) if they are different from the other values.

| Experiment                                          | DARR<br>20ms<br>(DL) | DARR<br>50ms<br>(DL) | DARR<br>200ms<br>(DL) | DARR<br>400ms<br>(DL) | DARR<br>400ms<br>(diluted) | 400us<br>CHHC<br>(DL) | 400us<br>CHHC<br>(diluted) |
|-----------------------------------------------------|----------------------|----------------------|-----------------------|-----------------------|----------------------------|-----------------------|----------------------------|
| MAS frequency [kHz]                                 | 19                   | 17                   | 15                    | 15                    | 15                         | 15                    | 15                         |
| pulse $^1\text{H}$ power/dB –<br>100kHz<br>100      | 0.5                  | 0.5                  | 1.1                   | 1.2                   | 0.9                        | 1                     | 1                          |
| pulse $^{13}\text{C}$ power/dB –<br>62.5kHz<br>62.5 | -0.6                 | -0.6                 | -0.6                  | -0.6                  | 0                          | -0.5                  | -0.4                       |
| pulse $^{15}\text{N}$ power/dB -<br>50kHz<br>50     |                      |                      | -0.6                  |                       |                            |                       |                            |
| <b>Transfer 1</b>                                   | HC-CP                | HC-CP                | HC-CP                 | HC-CP                 | HC-CP                      | HC-CP                 | HC-CP                      |
| field [kHz] $^{-1}\text{H}$                         | 74.9                 | 74.9                 | 80.3                  | 81.2                  | 78.5                       | 79.4                  | 79.4                       |
| field [kHz] -X                                      | 57.6                 | 61.8                 | 63.2                  | 63.2                  | 67.8                       | 68.6                  | 67.8                       |
| shape                                               | tangent              | tangent              | tangent               | tangent               | tangent                    | tangent               | tangent                    |
| carrier [ppm]                                       | -                    | -                    | -                     | -                     | -                          | CA                    | CA                         |
| time [ms]                                           | 0.9                  | 0.9                  | 0.9                   | 0.9                   | 0.9                        | 0.5                   | 0.5                        |
| <b>Transfer 2</b>                                   | DARR                 | DARR                 | DARR                  | DARR                  | DARR                       | H-H mixing            | H-H mixing                 |
| field [kHz] $^{-1}\text{H}$                         | 18.7                 | 17.7                 | 17.9                  | 18.1                  | 18.5                       | -                     | -                          |
| field [kHz] $^{-13}\text{C}$                        | -                    | -                    | -                     | -                     | -                          | -                     | -                          |
| field [kHz] $^{-15}\text{N}$                        | -                    | -                    | -                     | -                     | -                          | -                     | -                          |
| shape                                               | -                    | -                    | -                     | -                     | -                          | -                     | -                          |
| carrier [ppm]                                       | -                    | -                    | -                     | -                     | -                          | -                     | -                          |
| time [ms]                                           | 20                   | 50                   | 200                   | 400                   | 400                        | 0.4                   | 0.4                        |
| <b>t<sub>1</sub> increments</b>                     | 2560                 | 2560                 | 2560                  | 2048                  | 2048                       | 1856                  | 1856                       |
| sweep width (t <sub>1</sub> ) [kHz]                 | 100                  | 100                  | 100                   | 100                   | 100                        | 100                   | 100                        |
| max. acq time (t <sub>1</sub> ) [ms]                | 12.80                | 12.80                | 12.80                 | 10.24                 | 10.24                      | 9.28                  | 9.28                       |
| <b>t<sub>2</sub> increments</b>                     | 3968                 | 3072                 | 3072                  | 3024                  | 2560                       | 2816                  | 2816                       |
| sweep width (t <sub>2</sub> ) [kHz]                 | 100                  | 100                  | 100                   | 100                   | 100                        | 100                   | 100                        |
| max. acq time (t <sub>2</sub> ) [ms]                | 19.84                | 15.36                | 15.36                 | 15.12                 | 12.80                      | 14.08                 | 14.08                      |
| $^1\text{H}$ Spinal64 Decoupling<br>power [kHz]     | 90                   | 90                   | 90                    | 90                    | 90                         | 90                    | 90                         |
| interscan delay [s]                                 | 3                    | 2.5                  | 2                     | 2                     | 2                          | 2.3                   | 2.3                        |
| number of scans                                     | 8                    | 8                    | 64                    | 91                    | 152                        | 96                    | 240                        |
| total measurement time [h]                          | 17.3                 | 14.6                 | 100.8                 | 124.9                 | 208.6                      | 114.5                 | 286.1                      |

**Table S5.** Parameters used for solid-state NMR experiments for the structural calculation of the A $\beta$ (1-42) fibrils. DL:  $^{13}\text{C}$ ,  $^{15}\text{N}$ -labelled A $\beta$ , diluted: labeling of A $\beta$  in a ratio of  $^{13}\text{C}$ ,  $^{15}\text{N}$  :  $^{12}\text{C}$ ,  $^{14}\text{N}$  = 1:3, mixed:  $^{13}\text{C}$  and  $^{15}\text{N}$ -labelled A $\beta$  in a ratio of 1:1. Squared brackets indicate the values for the respective labeling (depicted also in brackets) if they are different from the other values.

| Experiment                                         | 8ms PAR (DL) | 8ms PAR (diluted) | 6ms PAIN (mixed) | 6ms PAIN (DL) | NHHC (mixed) | TEDOR (mixed) |
|----------------------------------------------------|--------------|-------------------|------------------|---------------|--------------|---------------|
| MAS frequency [kHz]                                | 15           | 15                | 17               | 17            | 17           | 12.5          |
| pulse $^1\text{H}$ power/dB – 100kHz<br>100        | 0.6          | 1.3               | 0.8              | 0.8           | 0.7          | 4             |
| pulse $^{13}\text{C}$ power/dB – 62.5kHz<br>62.5   | -0.6         | -0.8              | -0.6             | -0.6          | -0.6         | 2             |
| pulse $^{15}\text{N}$ power/dB – 50kHz<br>50       | -1           | -1.2              | -0.65            | -0.7          | -0.7         | -0.6          |
| <b>Transfer 1</b>                                  | HC-CP        | HC-CP             | HN-CP            | HN-CP         | HN-CP        | HC-CP         |
| field [kHz] $^{-1}\text{H}$                        | 75.8         | 74.9              | 69.1             | 69.1          | 68.3         | 50.0          |
| field [kHz] $^{-13}\text{C}$                       | 65.5         | 61.8              | 55.0             | 55.0          | 56.3         | 40.2          |
| shape                                              | tangent      | tangent           | tangent          | tangent       | tangent      | tangent       |
| carrier [ppm]                                      | -            | -                 | -                | -             | -            | -             |
| time [ms]                                          | 0.9          | 0.9               | 1.2              | 1.2           | 1.2          | 0.9           |
| <b>Transfer 2</b>                                  | PAR          | PAR               | PAIN             | PAIN          | H-H mixing   | TEDOR         |
| field [kHz] $^{-1}\text{H}$                        | 53.6         | 51.8              | 38.8             | 38.8          | -            | -             |
| field [kHz] $^{-13}\text{C}$                       | 52.0         | 52.6              | 36.7             | 36.7          | -            | 50.0          |
| field [kHz] $^{-15}\text{N}$                       |              |                   | 35.7             | 35.7          | -            | 50.0          |
| shape                                              | 60           | 60                | -                | -             | -            | -             |
| carrier [ppm]                                      | -            | -                 | -                | -             | -            | 55            |
| time [ms]                                          | 8            | 8                 | 6                | 6             | 0.5          | 10.8          |
| <b>t<sub>1</sub> increments</b>                    | 1856         | 1856              | 768              | 768           | 768          | 256           |
| sweep width (t <sub>1</sub> ) [kHz]                | 100          | 100               | 50               | 50            | 50           | 12.5          |
| max. acq time (t <sub>1</sub> ) [ms]               | 9.28         | 9.28              | 7.68             | 7.68          | 7.68         | 10.24         |
| <b>t<sub>2</sub> increments</b>                    | 2816         | 2816              | 2560             | 2560          | 2560         | 1536          |
| sweep width (t <sub>2</sub> ) [kHz]                | 100          | 100               | 100              | 100           | 100          | 50            |
| max. acq time (t <sub>2</sub> ) [ms]               | 14.08        | 14.08             | 12.80            | 12.80         | 12.80        | 15.36         |
| <b><math>^1\text{H}</math> Spinal64 Decoupling</b> |              |                   |                  |               |              |               |
| power [kHz]                                        | 90           | 90                | 90               | 90            | 90           | 90            |
| interscan delay [s]                                | 2.5          | 2.5               | 2.8              | 2.8           | 2.2          | 2.5           |
| number of scans                                    | 80           | 168               | 480              | 32            | 480          | 1024          |
| total measurement time [h]                         | 104.0        | 218.3             | 288.5            | 19.2          | 225.3        | 184.0         |

## Glossary on solid-state NMR experiments

**NCA(NCO):** In this experiment magnetization is transferred from proton to nitrogen and further selectively to bound  $^{13}\text{C}\alpha$  ( $^{13}\text{CO}$ ). This leads to a 2D  $^{13}\text{C}$ - $^{15}\text{N}$  spectrum, where each peak represents a carbon attached to the respective nitrogen.

**DARR (Dipolar Assisted Rotational Resonance):** Is an experiment, where the magnetization is transferred from a proton to  $^{13}\text{C}$  nuclei and further, assisted by the presence of protons, to other  $^{13}\text{C}$  nuclei close in space. The longer the mixing time, the further away the magnetization is transferred. This leads to a two dimensional  $^{13}\text{C}$ - $^{13}\text{C}$  spectrum.

**CHHC:** Is a homonuclear experiment and leads to a 2D  $^{13}\text{C}$ - $^{13}\text{C}$  spectrum. During the experiment the magnetization is transferred from a carbon to a bound proton and then further transferred to other protons close in space. Finally, it is back-transferred from the proton to bound  $^{13}\text{C}$  nuclei. Therefore, this experiment contains information about proton-proton distances.

**PAR ( $^{13}\text{C}$ - $^{13}\text{C}$  Proton Assisted Recoupling):** Same as DARR and CHHC, it is a homonuclear experiment leading to a 2D  $^{13}\text{C}$ - $^{13}\text{C}$  spectrum. However, a more specific transfer between the carbons is used compared to the DARR, exploiting cross terms between  $^{13}\text{C}$ - $^1\text{H}$  couplings. Consequently, it leads to less crowded spectra.

**NHHC:** Is a heteronuclear experiment, where the magnetization is transferred from a proton to nitrogen via cross polarization. It is transferred back to the proton, and further to other protons close in space, and finally back to the bound carbon for the detection. This leads to a 2D  $^{13}\text{C}$ - $^{15}\text{N}$  spectrum leading to distance information between protons.

**PAIN (Proton Assisted Insensitive Nuclei cross polarization):** Same as NHHC, it is a heteronuclear experiment, where protons are involved in the polarization transfer. However, it uses a different mechanism of transfer of magnetization and therefore leads to different/additional information.

**TEDOR (Transferred Echo Double Resonance):** Is a heteronuclear experiment, but in contrast to NHHC and PAIN the polarization transfer is achieved by direct recoupling of  $^{15}\text{N}$ - $^{13}\text{C}$  dipolar coupling. This leads to a 2D  $^{13}\text{C}$ - $^{15}\text{N}$  spectrum.

## Glossary on solution-state NMR experiments

**$^{15}\text{N}$ -HMQC (Heteronuclear Multiple-Quantum Correlation):** Is a 2D  $^1\text{H}$ - $^{15}\text{N}$  experiment. Each peak represents a proton frequency in one dimension and in the other the frequency of the bound carbon. With this experiment, protons are connected to the respective carbon.

**HNCA, HNCACB, HN(CO)CA:** Are standard 3D assignment sequences. In the HNCA, magnetization is transferred from the proton to the bound nitrogen and further to the  $^{13}\text{C}\alpha$  of the same and preceding amino acid residues. This leads to a 3D  $^1\text{H}$ - $^{15}\text{N}$ - $^{13}\text{C}$  spectrum. The HNCACB starts the same way as the HNCA, but also the  $^{13}\text{C}\beta$  of the same and preceding amino acid residues are detected. HNCA (and HNCACB) result in an ambiguous assignment of the amide resonance to both  $^{13}\text{C}\alpha$  (and  $^{13}\text{C}\beta$ ) nuclei. However, the HCN(CO)CA results only in the connection to the preceding amino acid residue leading to a unique assignment of the amide to the preceding residue and using the information provided from the HNCA also to the same amino acid residue.
